1 **Title:** Tissue-specific transcriptome for *Poeciliopsis prolifica* reveals evidence for genetic  
2 adaptation related to the evolution of a placental fish.

3 **Authors and Affiliations:**

4 Nathaniel K. Jue<sup>\*,†</sup>, Robert J. Foley<sup>\*</sup>, David N. Reznick<sup>‡</sup>, Rachel J. O'Neill<sup>\*</sup> and Michael J. O'Neill<sup>\*</sup>  
5

6 <sup>\*</sup> Institute for Systems Genomics and Department of Molecular and Cell Biology, University of  
7 Connecticut, Storrs, CT 06269

8 <sup>†</sup> current address: School of Natural Sciences, California State University, Monterey Bay,  
9 Seaside, CA 93933

10 <sup>‡</sup> Department of Biology, University of California, Riverside, CA 92521  
11

12 **Data deposition:**

13 All read data was deposited in the NCBI SRA database under the following accession numbers:  
14 SRR1639275, SRR1640127, SRR1640137, SRR1640160, SRR1640171, SRR1640200,  
15 SRR1640209, SRR1640216, and SRR1640219 under the BioProject PRJNA266248. This  
16 Transcriptome Shotgun Assembly project has been deposited at DDBJ/EMBL/GenBank under  
17 the accession GBYX00000000.1 and the same BioProject.

18 **Running Title:** Transcriptomics of Placental Fish

19 **Key words:** Transcriptome, Positive Selection, Gene Expression, Placenta, Fish

20 **Corresponding author:** Institute for Systems Genomics and Department of Molecular and Cell  
21 Biology, University of Connecticut, Storrs, CT 06269, USA, Ph: (860)486-6856, Fax: (860)486-  
22 1936, Email: michael.oneill@uconn.edu

23

## ABSTRACT

24           The evolution of the placenta is an excellent model to examine the evolutionary processes  
25 underlying adaptive complexity due to the recent, independent derivation of placentation in  
26 divergent animal lineages. In fishes, the family Poeciliidae offers the opportunity to study  
27 placental evolution with respect to variation in degree of post-fertilization maternal provisioning  
28 among closely related sister species. In this study, we present a detailed examination of a new  
29 reference transcriptome sequence for the live-bearing, matrotrophic fish, *Poeciliopsis prolifica*,  
30 from multiple-tissue RNA-seq data. We describe the genetic components active in liver, brain,  
31 late-stage embryo, and the maternal placental/ovarian complex, as well as associated patterns of  
32 positive selection in a suite of orthologous genes found in fishes. Results indicate the expression  
33 of many signaling transcripts, “non-coding” sequences and repetitive elements in the maternal  
34 placental/ovarian complex. Moreover, patterns of positive selection in protein sequence  
35 evolution were found associated with live-bearing fishes, generally, and the placental *P.*  
36 *prolifca*, specifically, that appear independent of the general live-bearer lifestyle. Much of the  
37 observed patterns of gene expression and positive selection are congruent with the evolution of  
38 placentation in fish functionally converging with mammalian placental evolution and with the  
39 patterns of rapid evolution facilitated by the teleost-specific whole genome duplication event.

40

## INTRODUCTION

41           The study of the placenta provides insight into the evolutionary relationships of  
42 biological phenomena such as complexity, live-birth and genetic conflict. A great deal of  
43 research has focused on the function and development of mammalian placentas, uncovering the  
44 unique regulatory, genetic, and evolutionary nature of this structure. Studies of gene regulation in  
45 the mammalian placenta show a suite of unique features including genomic imprinting (Bressan  
46 *et al.* 2009), non-coding RNAs (Koerner *et al.* 2009), and DNA methylation and histone-  
47 modification mediated transcription (Maltepe *et al.* 2010). The placenta also has been shown to  
48 be a tissue that utilizes genes derived from the co-option of retroelements for unique functional  
49 purposes (Lavialle *et al.* 2013). Additionally, the placenta has been used as a model for  
50 examining the evolution of tissue-specific novelties, such as newly derived cell-types (Lynch *et*  
51 *al.* 2011), placental variation among eutherian mammals (Carter and Mess 2007), and genomic  
52 imprinting related to viviparity (Renfree *et al.* 2013).

53 Placentation is typically studied in mammals, but fish present a compelling study system  
54 for examining contributing factors to the evolution of this complex organ. The Neotropical fish  
55 family Poeciliidae is comprised of approximately 200 species, all of which, with one exception,  
56 give live birth. The majority of these poeciliids are lecithotrophic (i.e. yolk-feeding), wherein  
57 eggs provide all necessary nutrients to support the embryo through development to birth.  
58 However, placenta-like structures that permit post-fertilization maternal provisioning have  
59 evolved independently in multiple poeciliid lineages, specifically within certain groups such as  
60 species in the genus *Poeciliopsis*, within the last 750,000 years (Reznick *et al.* 2002). Unlike  
61 comparisons between eutherian and marsupial mammals, who last shared an ancestor with their  
62 non-placental monotreme counterparts (i.e. the egg-laying platypus and echidnas) ~200 million  
63 years ago (Meredith *et al.* 2011), species within *Poeciliopsis* offer the opportunity to investigate  
64 more “recent” changes leading to viviparity and placentation. The relatively recent adaptation of  
65 placentation has resulted in wide variation among *Poeciliopsis* species with respect to the extent  
66 of maternal provisioning. The extent of maternal investment across species ranges from highly  
67 matrotrophic (i.e. placentotrophic) to lecithotrophic, including intermediate, or “partial”,  
68 placental species. These transitional states and independent evolutionary events make this system  
69 particularly powerful for examining factors contributing to the evolution of placentation (see  
70 Pollux *et al.* 2009 for review).

71 Although fish placentas exhibit functional convergence, they are diverse in structure,  
72 with poeciliid placentas bearing features distinct from mammalian placentas. In poeciliids, the  
73 maternal portion of the placenta is derived from the ovarian follicle. Fertilization occurs within  
74 the ovarian follicle wherein the embryo will subsequently develop. Within placental *Poeciliopsis*  
75 species, nutrient exchange occurs across an enlarged pericardial sac that contributes to a large,  
76 highly vascularized belly sac (Turner 1940). In the closely related poeciliid species *Heterandria*  
77 *formosa*, functionally convergent placental structures are notably divergent in structure; the  
78 aforementioned sac structure covers regions more anterior on the developing embryo (Turner  
79 1940). While specializations to the follicular epithelium, such as a thick, vascularized follicle  
80 wall with dense microvilli and specialized cytoplasmic organelles are common features in the  
81 maternal poeciliid placenta, much remains unknown about the ontogeny of the poeciliid  
82 follicular placenta (Turner 1940; Grove and Wourms 1991).

83 To define the genetic components contributing to placental function and examine the  
84 selective forces influencing the evolution of this unique poeciliid fish lineage, we constructed a  
85 new reference transcriptome for the placental fish *Poeciliopsis prolifica*, the blackstripe  
86 livebearer. A placental tissue-specific transcriptome profile was generated by comparison to non-  
87 placental tissues from *P. prolifica*, while patterns of protein evolution were compared with other  
88 closely and distantly related fish species. *P. prolifica* is a highly matrotrophic poeciliid fish that  
89 shares a hypothesized lecithotrophic common ancestor with recently diverged lecithotrophic  
90 sister taxa (Reznick *et al.* 2002), thus presenting a model system for examining evolutionary  
91 genetic changes proximal to the emergence of the placenta. Notably, we find evidence indicating  
92 genetic parallelism, both in function and evolution, of the fish placenta and the mammalian  
93 placenta.

## 94 METHODS AND MATERIALS

### 95 Samples

96 Tissue samples were harvested according to an IACUC approved protocol from captive  
97 populations of *Poeciliopsis prolifica* raised at the University of Connecticut. Original stocks  
98 were obtained from stock populations at the University of California-Riverside under care of Dr.  
99 David Reznick and from Ron Davis, a live-bearer hobbyist in Florida. Both populations  
100 originated from the same sample population from the Rio El Padillo in Mexico. Tissues were  
101 isolated from fish dissected on ice, immediately snap frozen with liquid nitrogen, and stored at -  
102 80° C. For this study, four sample types were isolated: female brain, liver, whole embryo, and  
103 the maternal placental/ovarian tissue complex (MPC). Whole female brain was dissected from  
104 the skull and is inclusive of the olfactory bulb, cerebrum, optic lobe, cerebellum and medulla  
105 oblongata (to the tip of the spinal cord). Due to its delicate nature, maternal placental tissue was  
106 isolated by dissecting whole ovary from pregnant females, excising any fertilized and observable  
107 unfertilized eggs, tearing open ovarian follicles, removing developing embryos from those  
108 follicles, and reserving the remaining maternal placental/ovarian tissue complex (MPC) that  
109 included both ovarian follicles and some remaining ovarian tissue (Figure S1). Late-stage (i.e.  
110 nearly full-term) whole embryos, identified by full pigmentation, large size, an ability to persist  
111 after being excised from ovarian follicle, and being "late-eyed" (Stage 5 as described by  
112 (Reznick 1981)) were sampled and stored with belly sacs intact.

113

## 114 **Sequencing**

115 Two types of sequencing platforms, Roche 454 and ABI SOLiD, were implemented in  
116 this study. For 454 sequencing, RNA was isolated from 20 different individuals by  
117 homogenizing and disrupting selected tissue samples with syringes in a Trizol solution. Due to  
118 individual isolation yields, required template inputs for library construction, and to compensate  
119 for among-individual variation, each RNA sample was then pooled by tissue type and mRNA  
120 was isolated from 5-10  $\mu$ g of total RNA using the Poly(A) Purist kit (Ambion). All RNA  
121 samples were assessed for quality on a Bio-Rad Experion both pre- and post-Poly(A) extraction.  
122 Sequencing libraries were made following standard RNA-Seq library construction protocol for  
123 454 sequencing and sequenced on a Roche 454 Sequencer. To generate SOLiD sequencing data,  
124 tissues for three individual MPCs and an embryo from one of these same females were first  
125 stored in RNALater and then at  $-80^{\circ}$  C. RNA was isolated by disruption and homogenization of  
126 tissues using a Polytron and the RNAeasy mini kit (Qiagen). DNA was removed from each  
127 sample by TurboDNase (Ambion) and validated for sample integrity using an Agilent  
128 Bioanalyzer. ERCC spike-in controls (Life Technologies) were then added to each sample and  
129 ribosomal RNA (rRNA) was removed using the Ribozero kit (Epicenter). Final RNA-Seq  
130 libraries were constructed from the resultant mRNA sample using standard SOLiD transcriptome  
131 library construction protocols. Libraries were sequenced on an ABI SOLiD 5500xl.

## 132 **Assembly**

133 Post-sequencing, all 454 reads were trimmed using 454 Newbler software to remove bar  
134 codes and the program CUTADAPT v1.2.1 (Martin 2011) to remove adapter sequences and trim  
135 low quality regions of reads. Seqclean was then used to remove poly-A tails. CUTADAPT was  
136 also used for trimming out all barcode and adapter sequences as well as quality trimming for  
137 SOLiD libraries. All SOLiD libraries were then screened against an in-house database of rRNA  
138 sequences to remove any rRNA sequences that may have not been removed in the rRNA-  
139 depletion step. All remaining SOLiD reads were normalized using the Trinity-associated *in silico*  
140 k-mer normalization protocols. All trimmed 454 reads and normalized SOLiD reads from all  
141 tissues were then input into the Trinity transcriptome assembler (release 7/17/2014) (Grabherr *et*

142 *al.* 2011). Following the Trinotate pipeline (release 4/30/2015) for annotating predicted  
143 transcripts (Haas *et al.* 2013), open-reading frames (ORFs) were predicted using Transdecoder  
144 (release 1/27/2015). All transcripts and predicted proteins were then annotated via homology  
145 against the SwissProt/Uniprot database and assigned any associated Gene Ontology (GO) terms  
146 and eggNOG orthologs group membership. Predicted proteins were also searched for PFAM  
147 protein domain and identification as a signaling protein using SignalP (v4.1) (Nielsen 2017),  
148 transmembrane protein using TMHMM (v2.0) (Krogh *et al.* 2001), or ribosomal RNA using  
149 RNAmmer (v1.2) (Lagesen *et al.* 2007). All transcripts were examined for any additional  
150 homologies against the NCBI *nr* database using BLASTX and annotated using BLAST2GO  
151 (v2.5.0) (Conesa *et al.* 2005). Any transcript without an *nr* BLASTX-hit was also searched  
152 against the NCBI *nt* database with BLASTN. Finally, all transcripts were assessed with  
153 BLASTN for homology with known non-coding RNAs (ncRNAs) identified in zebrafish (*Danio*  
154 *rerio*) (Ulitsky *et al.* 2011). Databases versions for all homology searches were all updated on  
155 7/1/15 before this analysis was completed.

156 Tissue-specific gene expression patterns were surveyed by mapping reads to the Trinity  
157 assembled transcriptome sequence, quantifying read coverage among transcripts, and testing for  
158 differences among comparison groups. Mapping was performed using BWA (v0.7.7)(SW  
159 algorithm) (Li and Durbin 2010) for all 454 data, and Bowtie2 (v4.1.2) (Langmead and Salzberg  
160 2012) for all SOLiD data. Gene expression and read counts were estimated for all transcripts  
161 using the program eXpress v1.5.1 (Roberts and Pachter 2013). Count data from 454 mapping  
162 was passed through R-based DESeq2 analysis (Love *et al.* 2014) to assess significant differences  
163 in pairwise comparisons of gene expression patterns among tissue samples, while correcting p-  
164 values for False Discovery Rates (FDR) due to multiple comparison tests. Since sequencing  
165 libraries were generated from pooled samples, they were assumed to represent an “average”  
166 perspective. Due to the lack of replicates of pooled samples, best practices outlined in the  
167 DESeq2 manual were used to generate dispersion estimates by comparing counts among tissue  
168 types as opposed to between replicates. This process should be conservative with respect to false  
169 positives since it errs on the side of using larger than necessary dispersion values. FPKM  
170 (fragments per kilobase per millions reads) values were then used in BioLayout Express3D  
171 (v3.2) (Theocharidis *et al.* 2009), along with the MCL (v12-068) clustering algorithm (van  
172 Dongen and Abreu-Goodger 2012), to generate a preliminary 3-D gene atlas of co-expressed

173 genes clusters. Due to modest read coverage of 454 sequencing libraries, only “highly”  
174 expressed genes (an FPKM value > 50 in at least one tissue) were included in clustering  
175 analyses.

## 176 **Evolutionary Rates**

177 Evidence of positive selection in the evolutionary rates of poeciliid genes was tested  
178 using the branch-sites models implemented in the program PAML v4.7 (Yang 2007). cDNA  
179 resources for six other species of fish whose genome and gene models have already been  
180 described were downloaded from ENSEMBL and compared to our sequences for *P. prolifica*.  
181 These species included the following: *Danio rerio*, *Gadus morhua*, *Takifugu rubripes*,  
182 *Oreochromis niloticus*, *Gasterosteus aculeatus*, and *Xiphophorus maculatus* (Figure S2). Of  
183 these six species, *X. maculatus* is the most closely-related species to *P. prolifica*; both are in the  
184 family Poeciliidae. However, *X. maculatus* differs significantly from *P. prolifica* in reproductive-  
185 style since it is a lecithotrophic (yolk-feeding) live-bearer with no evidence of post-fertilization  
186 maternal provisioning. *P. prolifica* is highly matrotrophic, with sufficient post-fertilization  
187 maternal provisioning to sustain an eight fold increase in dry mass between the fertilization of  
188 the egg and birth (Pires *et al.* 2007). Predicted coding sequence regions for *P. prolifica* were  
189 compared to cDNA reference sequences for each species using reciprocal best BLAST hit  
190 approaches (TBLASTX in this case) to identify orthologous genes between species. Once  
191 orthologs were identified, all orthologous gene clusters that lacked a predicted ortholog for any  
192 species (i.e. no reciprocal best BLAST hit found) or, when examining high-scoring segment pair  
193 (HSP) alignment regions, that yielded a multiple sequence alignments less than <200 bp long  
194 were discarded. Using in-house Python scripts, the remaining orthologs were passed through a  
195 series of analysis steps. Groups of orthologs were first reconstructed in the same strand and  
196 aligned using the codon-guided multiple sequence alignment (MSA) algorithm MACSE v 0.9b1  
197 (Ranwez *et al.* 2011). MSAs were cleaned using trimAl (Capella-Gutiérrez *et al.* 2009) to  
198 remove all gaps both from within, and at the ends of, the aligned sequences. MACSE includes  
199 the convenient feature of assessing frameshift and stop codon issues associated with multiple  
200 sequence alignment. Thus, in order to avoid confounding alignment problems related to poor  
201 data quality, low scoring MSAs and true pseudogenized gene sequences, all of which would  
202 contribute to false positives in subsequent PAML analyses, this feature was leveraged to identify



203 and remove any MSA with either a frameshift ambiguity or base ambiguity from further  
204 analysis.

205 The remaining MSAs were then analyzed in PAML with three different phylogenetic  
206 “foregrounds” to test for positive selection in rapid codon evolutionary rates: *P. prolifica* only, *X.*  
207 *maculatus* only, and all poeciliids. These three levels of examination provided a proxy test of the  
208 evolutionary changes possibly associated with three reproductive-styles, respectively:  
209 matrotrophic viviparity, lecithotrophic viviparity, and viviparity (generally). Classification of sites  
210 having significant evidence for being under positive selection required a significantly better fit of  
211 the branch-sites alternative model of positive selection over the null model (implemented as  
212 described in the PAML manual – Model 2A vs. Model 1A – with a  $\chi^2$  test using p-value < 0.05 as  
213 the threshold for identifying significant improvements in maximum likelihood model fit) and  
214 identification using the Bayes empirical Bayes (BEB) method (p-value >0.95). All sites and  
215 predicted proteins were compared among different “foreground” analyses to classify protein  
216 evolution associated with the aforementioned reproductive-style that these species represent.

217 A distance-based gene family tree for the *RAB11 family-interacting protein* gene family  
218 (*RAB11FIP*) was constructed using neighbor-joining tree methods to describe the general  
219 patterns of gene duplication and evolution in fishes. Jukes-Cantor distances among protein  
220 sequences were used to generate tree topology. All sequences included in this gene family tree  
221 were gathered by identifying any *P. prolifica* predicted protein sequence with homology to  
222 *RAB11FIPs* in *Danio rerio* using BLASTP (e-value < 1e-5) and using those predicted proteins to  
223 identify any other existing protein sequences for *RAB11FIP* genes in fishes using BLASTP (e-  
224 value <1e-5; taxonomically restricted search to “bony fishes” – taxid: 7898). MUSCLE v3.8.31  
225 (Edgar 2004) was used to generate a multiple sequence alignment for all sequences and CLC  
226 Genomics Workbench v7.5 was used to generate a tree with 100 bootstraps. To focus analysis on  
227 *RAB11FIP* genes only, all clusters of genes identified as the protein *UNC-13* (a homologous  
228 gene to *RAB11FIPs*) were trimmed from final tree.

#### 229 **Data Availability:**

230 All read data was deposited in the NCBI SRA database under the following accession numbers:  
231 SRR1639275, SRR1640127, SRR1640137, SRR1640160, SRR1640171, SRR1640200,

232 SRR1640209, SRR1640216, and SRR1640219 under the BioProject PRJNA266248. All custom  
233 scripts are available here:

234 [https://github.com/juefish/Jue\\_et\\_al\\_G3\\_P\\_prolifica\\_transcriptome.git](https://github.com/juefish/Jue_et_al_G3_P_prolifica_transcriptome.git).

## 235 RESULTS

### 236 Assembly Statistics

237 *De novo* assembly of 3,696,154 Roche 454 and 159,802,508 SOLiD reads (post-  
238 trimming, see Table S1 for library details) yielded a transcriptome of 331,767,677 Mb (43.74%  
239 GC) with 478,065 predicted transcripts (TSA Reference ID: GBYX00000000.1). Average contig  
240 length was 639 bp and N50 was 885 bp. These contigs were grouped into 319,532 components,  
241 which are analogous to estimated “genes” or groups of isoforms (Table 1). While some of these  
242 predicted transcripts could be spurious or fragmented results from the assembler, 236,360  
243 (49.4%) of these predicted transcripts were well-supported with read depth of coverage >10x,  
244 representing a very diverse transcriptome (Table 1).

245 Within this assembled transcriptome, 113,240 transcripts (23.6% of total) were predicted  
246 to have a protein open-reading frame (ORF) (Figure 1), with over 80% of these predicted  
247 proteins (both total transcripts and genes) carrying homology with a protein in the  
248 UniProtKB/Swiss-Prot database, and >75% of those showing associations with known Pfam  
249 domains (Figure 1). Functional Gene Ontology (GO) annotations were identified for the majority  
250 of these sequences with homology to *nr* database reference sequences, representing a multitude  
251 of functional elements, spanning a range of categories in the Gene Ontology (Figure 2). Another  
252 41,851 transcripts with no BLAST result at all (8.7%) showed similarity to REPBASE repetitive  
253 element sequences, including 1,747 transcripts from 1,043 predicted genes that incorporated  
254 repetitive element genes (Table S3). These transcripts span a wide-range of repetitive element  
255 origins, including elements known to have specific placental function in mammals such as  
256 *retrotransposon-derived protein PEG10-like*. Another 286 transcripts carry regions identified by  
257 homology with non-coding RNAs from *D. rerio*. These transcripts represent a variety of non-  
258 coding RNAs that may be involved in gene regulation (Table S4). For instance, one identified  
259 transcript shows homology with *cyrano*, a lncRNA demonstrated to be necessary for proper  
260 embryonic development and interacting with a known miRNA miR-7 (Ulitsky *et al.* 2011). A

261 small number (24) of these transcripts showed evidence for bidirectional transcription and, thus,  
262 candidates for active functioning in gene regulation through complementary base-pairing with  
263 coding transcripts.

## 264 **Tissue Specific Gene Expression**

265 Using MCL clustering of gene expression estimates, we generated a preliminary gene  
266 atlas for *P. prolifica* to identify clusters of co-expressed transcripts among four different sample  
267 types: MPC, female brain, liver, and late-stage developing embryo, hereafter referred to as  
268 "tissues". Before clustering, pairwise tests for significant differences (p-value <0.05 after  
269 correction for FDR) in gene expression using DESeq2 were conducted across all transcripts in all  
270 tissues and revealed 45, 108, 18, and 24 transcripts were specifically expressed in MPC, whole  
271 embryo, brain and liver, respectively. For MCL clustering analysis and gene atlas construction, a  
272 subsample of the 6,839 most highly expressed transcripts (FPKM values >50 in at least one of  
273 the four tissues) were included in the analysis. This subset further reduced the number of  
274 identifiable (via pairwise comparisons) tissue-specific transcripts included in the atlas that were  
275 significant for tissue-specific expression to 24, 36, 4, and 5 for MPC, embryo, brain and liver,  
276 respectively. Using the tissue-specific gene expression patterns of these transcripts (Figure S3)  
277 and the MCL clustering algorithm, nine co-expressed gene clusters were identified (Figure 3).  
278 Cluster 1 was the largest cluster and generally associated with transcripts that have high  
279 expression in the brain, but showing some co-expression with other tissues, particularly MPC  
280 and embryo. Cluster 2 was generally associated with transcripts highly expressed in embryo,  
281 cluster 3 was associated with transcripts highly expressed in MPC, and cluster 4 was associated  
282 with transcripts highly expressed in liver. Clusters 5 to 9 (which represented only 2.2% of the  
283 transcripts in the atlas) were defined by expression across multiple tissue types, displaying gene  
284 expression profiles indicative of "house-keeping"-like genes (Figure S3). Transcripts with  
285 significant evidence for tissue-specific expression largely supported these cluster classifications  
286 with 32 of the 36 aforementioned "embryo"-specific genes in cluster 2 and all 24 of the MPC  
287 genes in cluster 3. Brain and liver clusters were less clearly supported with none of the four  
288 "brain" genes in cluster 1 and only one of the five "liver" genes in cluster 4; however, the  
289 number of transcripts in these clusters was so low that detectability may have been limited.  
290 Transcripts involved in progesterone signaling pathways were observed as highly expressed in

291 placental tissues. Overall, 242 transcripts with ORFs were identified as having GO-associations  
292 with progesterone regulatory pathways, including *Protein DEPP* (*decidual protein induced by*  
293 *progesterone*), suggesting that similar developmental patterns in cell differentiation and  
294 specialization maybe be occurring in fish as it does in mammals during pregnancy (Watanabe, et  
295 al. 2005).

## 296 **Repetitive Element Transcripts**

297         Repetitive element gene expression was observed across various tissue samples and a  
298 subset of the gene atlas clusters. Of the clustered 454 expression data, the MPC cluster (#3) had  
299 the highest number of repetitive element transcripts, with a total of 9 transcripts; the “brain”  
300 cluster (#1) had the second highest repetitive element transcript count at five transcripts. Cluster  
301 2 (embryo), cluster 4 (liver), and cluster 5 (multiple tissues) had 2, 1, and 1 transcript(s),  
302 respectively. Only one transcript of these 18 transcripts found in the gene atlas clusters  
303 (identified as a *transposable element tc1 transposase*) showed no expression in placenta; all 17  
304 other transcripts were expressed (>50 FPKM) in MPC (eight of these transcripts were also  
305 identified as homologs to *transposable element tc1 transposases*). One transcript (a *reverse*  
306 *transcriptase*) was also identified using the aforementioned pairwise significance testing  
307 (DEseq2, p-value < 0.05) as more expressed in MPC as opposed to other tissues (FPKM<sub>MPC</sub> =  
308 155.7 vs. FPKM<sub>average\_other\_tissues</sub> = 5.07). The three MPC SOLiD libraries also indicated high  
309 levels of MPC gene expression of repetitive element-derived transcripts. From the SOLiD RNA-  
310 Seq data, 98% of the 1,747 transcripts from the broader transcriptome reference sequence and  
311 originating from repetitive elements were expressed in either MPC or embryonic tissues, with  
312 227 predicted transcripts from 199 predicted genes expressed either only in the MPC or >5 fold  
313 greater expression in MPC over embryonic tissues (Table S3). Approximately an equal number,  
314 213 predicted transcripts and 199 predicted genes were found associated with embryonic tissues  
315 using the same criteria (Table S3). Eight transcripts had an FPKM value of >50 across and were  
316 identified as four gene families that included an envelope protein, a partial pol protein, a tc1  
317 transposase and a tc3 element. In addition to the gene classes mentioned above, other repetitive-  
318 element transcripts were identified as *retrotransposon-derived protein PEG10-like, 120.7 kDa*  
319 *protein in NOF-FB transposable element, retroviral polyprotein, and transposable element tcb1*  
320 *transposases*. These transcripts appeared unique to the poeciliid lineage, showing between 50%

321 and 70% similarity to other repetitive element reference sequences from other species, with only  
322 *retrotransposon-derived protein PEG10-like* showing high similarity (88%) with reference  
323 sequences from the NCBI *nr* database.

### 324 **Transcripts with Unknown Function**

325 The majority of these clusters of highly expressed genes consisted of transcripts with no  
326 known annotation. Of the highly expressed transcripts described in these clusters, 79.4%  
327 (n=6260) were not identifiable via BLAST searches of SwissProt/UniProt, *nr* and *nt* databases  
328 (e-value < 1 x 10<sup>-5</sup>). A large number (786, or 12.6%, of the total unknowns) of these predicted  
329 transcripts had evidence for some type of repeat in their sequence, with 761 of the repeats  
330 identified as either a simple repeat or low complexity sequence, indicating that the sequence may  
331 be part of a non-coding region (Wren *et al.* 2000; Morgante *et al.* 2002; Liu *et al.* 2012). Many  
332 of these sequences are likely either species-specific 5' or 3' UTRs or previously undescribed  
333 non-coding RNAs. For example, another four of these transcripts in this cluster were associated  
334 with known non-coding RNA sequence from *D. rerio* (3 with miRNAs and 1 with a lncRNA);  
335 however, given that all of these sequences were much longer than miRNA size (312-982 bp) and  
336 not readily identifiable as miRNA precursors (Liu *et al.* 2015), they are more likely to be binding  
337 sites for such targets than host transcripts. Another 49 transcripts had predicted ORFs associated  
338 with them, but no BLAST annotation and thus appear to be novel protein sequences. Of these 49  
339 predicted proteins, two were identified as prospective signaling peptides, one of which was a  
340 member of the MPC gene cluster. The other “signaling” peptide and two other predicted proteins  
341 were identified as transmembrane proteins. The signaling/transmembrane protein was a member  
342 of the “house-keeping gene” cluster (but most highly expressed in liver), while the other two  
343 transmembrane proteins were associated with either the “brain” cluster or the “embryo” cluster.  
344 Notably, the “embryo” cluster member was also highly expressed in MPC (FPKM<sub>embryo</sub>=53.5;  
345 FPKM<sub>placenta</sub>=39.5). Given exhaustive attempts to annotate these sequences and the fact that they  
346 are highly expressed transcripts, these sequences appear to be novel to this species.

### 347 **Protein Evolutionary Rates**

348 Reciprocal best BLAST hits of the cDNA coding sequence against the predicted and  
349 known cDNAs for six fish species with sequenced genomes revealed predicted *P. prolifica*

350 transcripts to have 12,631 orthologs with *Danio rerio*, 14,761 orthologs with *Xiphophorus*  
351 *maculatus*, 12,899 orthologs with *Takifugu rubripes*, 12,316 orthologs with *Gadus morhua*,  
352 13,388 orthologs with *Gasterosteus aculeatus*, and 13,282 orthologs with *Oreochromis niloticus*.  
353 Out of all of these orthologs, only 5,398 were shared orthologs for all seven species (including *P.*  
354 *prolififica*). Within this shared ortholog set, 963 ortholog alignments showed evidence of open-  
355 reading frame indels in at least one species' orthologous sequence, resulting in a frame-shift in  
356 predicted codon sequences (Table S5). These frame-shifts could be the result of errors in a given  
357 fish reference sequence or bona fide mutations in a specific species. While all species showed  
358 evidence for frame-shifts, transcript sequences from *D. rerio*, *P. prolififica*, and *X. maculatus* had  
359 a higher proportion of orthologs with an identified frame-shift than the remaining species (Table  
360 S5). Additionally, 978 ortholog groups were discarded from the PAML analysis due to  
361 ambiguous bases ("N") in the reference sequences; this was a disproportionately acute issue with  
362 *G. morhua* sequences (912 orthologs).

363         Within the final set of 3,457 orthologs employed in our PAML analyses, 2,298 sites  
364 across 404 predicted proteins were identified as undergoing positive selection. Of these sites,  
365 917, 1104, and 247 were associated with *P. prolififica*, *X. maculatus*, and both poeciliids,  
366 respectively (Figure 4, Table S6-S13). The predicted proteins carrying these sites covered a  
367 wide-range of biological functions (Figure S4) with no overall significant enrichment for any  
368 specific functional GO terms relative to the overall transcriptome annotation. Comparisons  
369 between the matrotrophic *P. prolififica* and lecithotrophic *X. maculatus* orthologs with sites under  
370 positive selection showed genes under positive selection in *P. prolififica* to be significantly  
371 enriched for a variety of GO terms over those found in *X. maculatus* (Figure 5, FDR p-value <  
372 0.05). The terms were generally associated with Biological Processes related to biosynthesis and  
373 regulatory processes, Molecular Functions terms related to nucleic acid binding, and Cellular  
374 Components terms related to the nucleus. Of these sites, 1,376 occurred in regions of these open-  
375 reading frames that carried no discernable, previously known protein domain defined by Pfam  
376 database searches. Thus, these sites indicate possible novel functional domains for these proteins  
377 in *P. prolififica*.

378         While the majority of proteins undergoing positive selection (67%) had less than five  
379 sites identified as under positive selection, many of the genes under positive selection exhibited

380 evidence for extensive rapid evolution (Table S7). For instance, the *GRAM domain-containing*  
381 *protein 4, GRAMD4*, carries 94 sites identified as evolving rapidly in *X. maculatus*. These sites  
382 account for 16% of the entire protein sequence for this gene. None of these sites overlap with the  
383 known GRAM protein domain, indicating that this region may be an important novel functional  
384 domain. *GRAMD4* is a membrane protein known to be a tumor suppressor in apoptotic pathways  
385 associated with mitochondria (John *et al.* 2011). *Insulin-like growth factor 1a receptor (IGF1RA)*  
386 is another gene that has a large number of sites under positive selection in *X. maculatus*. Overall,  
387 96 sites within *IGF1RA* were shown to be under positive selection, with eight sites showing  
388 changes in both poeciliids, while the remaining 88 were restricted to *X. maculatus* (Figure 6).  
389 Protein lengths for *IGF1RA* vary among species. In our *P. prolifica* assembly, we have predicted  
390 only 711 residues for this protein, but our sequence may be incomplete as it lacks a 3' UTR  
391 region. Within *X. maculatus* where there is a complete predicted gene sequence (1,332 aa), these  
392 96 sites account for ~7% of the gene sequence. Of the 96 sites, 48 are located within the Furin-  
393 like domain of the protein, 36 are in one of the Receptor L-domains, one is in the Fibronectin  
394 type III domain, and 11 are found outside of any known protein domain.

395 *P. prolifica* generally showed different genes under positive selection than *X. maculatus*  
396 (Figure 4; only 17.1% of the 404 orthologs under positive selection showed positive selection in  
397 both species). For example, *RAB11 family-interacting protein 4-like (RAB11FIP4)*, one of the six  
398 types of *RAB11 family-interacting proteins* found in fishes (Figure S5), has 16 sites under  
399 positive selection in *P. prolifica*, but none in *X. maculatus*, while another member of that same  
400 gene family, *RAB11 family-interacting protein 1-like (RAB11FIP1)*, has 5 sites under positive  
401 selection in *X. maculatus* and 1 in both *X. maculatus* and *P. prolifica* (the 2 species have  
402 different residues at that site). These sites may be associated with novel functional domains  
403 because each of these sites were identified as being extracellular for both *RAB11FIP1* and  
404 *RAB11FIP4* using the transmembrane identification algorithm TMHMM; however, none of these  
405 sites are located within any “known” functional domain (Figure 6). Patterns of gene evolution  
406 across fish species show that the rapid gene evolution may be likely facilitated by multiple  
407 incidences of gene duplication. Along with *IGF1RA*, *RAB11FIP* gene family members showed  
408 family-wide evidence for gene duplication events and both *RAB11FIP* genes that were shown to  
409 be under positive selection had expressed paralogs in the reference transcriptome sequence  
410 (Figure S5). These duplications likely occurred after the whole genome duplication event

411 experienced by all fishes (Jaillon *et al.* 2004) since there is only one copy of each family member  
412 found in the gar, *Lepisosteus oculatus*, (Figure S5) which has not undergone the teleost fish  
413 whole genome duplication event.

## 414 DISCUSSION

415 We have developed the most thorough transcriptome reference for a placental fish to  
416 date, providing a significant extension to earlier work in a sister taxa (Panhuis *et al.* 2011), in  
417 order to better understand the genetics and evolution of placentation in fish. Our sequence  
418 assembly has been extensively annotated for functional content and provides a solid foundation  
419 for establishing genomic resources for this genus. Identified transcripts cover diverse functions  
420 and, given the sampling of both poly-A selected and ribo-depleted RNAs across multiple  
421 tissues, provide a comprehensive assessment of both protein-coding and non-coding RNA genes  
422 organism-wide. In addition to its general descriptive characteristics, this transcriptome reference  
423 has also provided us with important insights into the genetics of this placental species.

424 There appears to be parallels in placental evolution in eutherian mammals and *P.*  
425 *prolifera*, highlighted by the extensive presence of expressed repetitive elements in fish MPC  
426 tissues. Eutherian mammals often utilize repetitive element components as functional  
427 contributions to placental and embryonic development, including endogenous retroviral envelope  
428 proteins (Mi *et al.* 2000), DNA transposon regulatory machinery (Lynch *et al.* 2011), and/or *gag*  
429 and *pol* domains of LTRs (Ono *et al.* 2001). A total of 98% of the transcripts associated with  
430 retroelements exhibited high expression to either placental or embryonic tissues. These  
431 transcripts included a variety of orthologous genes associated with placental function in  
432 mammals, such as *PEG10*, an imprinted gene expressed in the placenta of mammals. The  
433 extensive presence of progesterone signaling-related genes also parallels mammalian placental  
434 function, particularly functions associated with the corpus luteum (Gemmell 1995) and decidual  
435 cells (observed expression of *Protein DEPP* in fish MPC parallels that also described in  
436 mammalian placental and embryonic tissues (Watanabe *et al.* 2005)). Alternatively, expressed  
437 repetitive element transposases may be co-opted genes involved in more general gene regulation  
438 as transcription factors or DNA-binding proteins with centromeric functional roles (Feschotte  
439 2008). The identification of seemingly convergent gene expression of genetic elements of similar  
440 type, but different lineage and an apparent implication in the function of the independently



441 derived placental tissues of fish and mammals leads to a hypothesis that similar molecular and  
442 cellular adaptations are functioning in both systems.

443         There was also extensive evidence for placental tissue usage of novel genes and  
444 transcripts as functional components specific to this family of fishes and, possibly, restricted to  
445 this species. Tissue-specific patterns of high gene expression implicate many novel components  
446 to be active in the MPC. Most of these novel, predicted transcripts lacked homology to genes in  
447 any existing genetic resource, strengthening support for their designation as “novel”. In total,  
448 17.6% of the predicted protein sequences in the reference transcriptome could not be associated  
449 with any existing reference sequence via exhaustive comparison to known protein and coding  
450 sequence databases. Mis-assembly and/or chimeric reads could only explain a minority of these  
451 “unknowns” as the depth of coverage was generally high for these genes and, as evidenced by  
452 the clustering analysis, many of these transcripts are highly expressed. Many “unknowns” (~9%)  
453 were found to contain repetitive elements or have sequence homology with non-coding RNAs,  
454 implicating the co-option of rapidly evolving elements in the origins of this novel transcriptional  
455 diversity. As our pairwise ortholog identification shows, the closer the phylogenetic species  
456 comparison is, the greater the proportion of the transcriptome we could identify and annotate  
457 (e.g. 14,761 orthologs were found in *X. maculatus* vs. 12,631 orthologs in *D. rerio* for a 16.9%  
458 increase in the number of identified orthologs). Overall, novel transcripts would appear to be  
459 significant contributors to placental function in *Poeciliopsis*. This prediction is also congruent  
460 with mammalian placental systems, wherein many of the transcripts observed associated with  
461 placental development and function are derived from lineage-specific co-option and  
462 domestication of typically inactive retroelements (Emera and Wagner 2012).

### 463 **Role of Protein Evolution/Positive Selection**

464         Using our reference sequence, we identified genes under positive selection in both  
465 matrotrophic (*P. prolifica*) and lecithotrophic (*X. maculatus*) species of livebearing poeciliid  
466 fishes. Overall, genes identified as under positive selection did not disproportionately represent  
467 any specific functional group, indicating that any genetic signal of adaptation identified in this  
468 analysis covered a wide-array of functional components in the Poeciliidae. However, the  
469 statistically significant differences in functional groups among the lecithotrophic *X. maculatus*,  
470 and the matrotrophic *P. prolifica* undergoing positive selection indicate that there may be

471 selective bias in the types of genes contributing to the rapid evolution of placentation in this  
472 group. The identification of genes related to biosynthesis and gene regulation, especially those  
473 associated with DNA-binding in nuclear regions, are significantly over-represented in genes  
474 under positive selection in our placental species. That these functional categories would be under  
475 strong selective pressure is consistent with the inherent requirement for placental tissues to  
476 develop quickly to support embryonic growth as well as the potential for parent-offspring  
477 intragenomic conflict. The unexpectedly extensive protein-coding sequence evolution is highly  
478 relevant to continued interest in the relative contribution of either changes at the protein-coding  
479 level or those in gene regulation contributing to evolutionary patterns (Hoekstra and Coyne  
480 2007; Lynch and Wagner 2008; Stern and Orgogozo 2008).

481 While the majority of genes under positive selection contain only a few sites that are  
482 rapidly evolving, some genes exhibit evidence of surprisingly large regions of their coding  
483 sequence under Darwinian selection. Evidence of gene duplication would appear to facilitate the  
484 potential for positive selection. For example, while the insulin-like growth factor signaling axis  
485 is a key regulator of embryogenesis and fetal growth in all vertebrates (Schlueter *et al.* 2007),  
486 there is considerable redundancy in many of its components in fishes due to the ancient WGD  
487 (Jaillon *et al.* 2004). Specifically, there are multiple copies of *insulin growth factor receptor 1*  
488 (paralogs A and B). It has been established for the genus *Poeciliopsis* that *IGF2* has evolved  
489 under positive selection that is hypothesized to be driven by parent-offspring conflict (O'Neill *et*  
490 *al.* 2007). While *IGF2* is excluded in our analysis due to stringency filters (it has a large indel  
491 region in *P. prolifica* and the HSP alignment region was too short for inclusion), *IGF1RA* (also  
492 known to be expressed in fish gonadal tissues (Mei *et al.* 2014)) was shown to have extensive  
493 evidence for rapid evolution in this group with eight sites evolving rapidly in all Poeciliidae and  
494 84 sites under positive selection in just *X. maculatus*. These 92 sites cover both conserved  
495 protein domains and unannotated regions of the protein. The signal for positive selection on both  
496 *IGF2* and *IGF1RA* in poeciliids may reflect the opposing parent-specific expression (imprinting)  
497 of *IGF2* and its antagonistic receptor *IGF2R* in mammals. However, if conflict is driving this  
498 pattern, then it seems to be pushed to extremes in the non-placental *X. maculatus*, where *IGF2*  
499 has also been shown to be under positive selection (Schartl *et al.* 2013). This would appear to  
500 contradict assumptions of the hypothesis that parent-offspring conflict would be more extensive  
501 in placental species (Zeh and Zeh 2008); alternatively, this observation may indicate that conflict

502 manifests itself differently in the absence of material exchange between mother and fetus. For  
503 instance, selection may be acting on the duration of ovoviviparous development in *X. maculatus*,  
504 where different paternal genomes compete for gestational space within the mother, while the  
505 maternal genome dictates the length of her pregnancy and maximum occupancy of gestational  
506 spaces.

507 While, speculatively, *IGFIRA* may exhibit evidence for selective pressure due to genetic  
508 conflict in the lecithotrophic *X. maculatus*, it is possible that other biological processes specific  
509 to viviparous reproduction are also under selection in *P. prolifica*. For example, the *RAB11FIP*  
510 genes show lineage-specific patterns of protein evolution, indicating different selection pressures  
511 in *P. prolifica* and *X. maculatus*. *RAB11FIP*-associated proteins are typically identified by the  
512 presence of a C-terminal Rab-binding domain and are involved in vesicle transport and recycling  
513 (Lindsay 2004), protein trafficking and sorting (Peden *et al.* 2004) and recycling of membranes  
514 in cytokinesis (Wallace *et al.* 2002). It is unclear precisely why these genes are under positive  
515 selection in these fish, but given their defined functions they may be responding to lineage-  
516 specific selection pressure involving cellular transport related to the evolution of live-bearing.  
517 Gene duplication is likely providing a considerable contribution to the potential for these genes  
518 to undergo changes due to positive selection (e.g. Steinke *et al.* 2006). Just as in the *IGFIR*  
519 genes, each of these two *RAB11FIP* genes has a closely related paralogous copy that showed no  
520 evidence for positive selection (Figure S5).

521 Overall, our study demonstrates patterns of both sequence and functional convergence of  
522 the poeciliid placenta with the therian mammalian placenta. In contrast to predictions that genetic  
523 components would be distinct to the poeciliid lineage given the relatively recent convergent  
524 derivation of the fish placenta from the pericardial sac and its highly dissimilar structural form,  
525 many of the genetic components that contribute to mammalian placental development and  
526 function are also involved in the fish placenta. While it could be predicted that at least some of  
527 the types of genes involved in placentation in both lineages would be similar with respect to  
528 cellular function and functional requirements of any placenta in maternal-fetal exchange, it is  
529 notable that we find parallel evolutionary mechanisms, beyond such cohorts of genes, evident in  
530 the co-option of retroelements and gene duplication as key contributors to the evolution of this  
531 complex organ.

532

533 **Acknowledgements:**

534 Thanks to Ron Davis for volunteering fish from his personal stocks to support this work and  
535 Valeria Pellicer for her illustration. This work was supported by NSF Project Grant IOS-0920088  
536 to MJO and RJO and NSF-MRI 0821466 to Linda Strausbaugh and RJO, and an MRI-R2 to  
537 MJO and RJO. This work was supported by the facilities of the Center for Genome Innovation  
538 (formerly the Center for Applied Genetics) within the Institute for Systems Genomics.

539

REFERENCES

- 540 Bressan, F. F., T. H. C. De Bem, F. Perecin, F. L. Lopes, C. E. Ambrosio *et al.*, 2009 Unearthing  
541 the roles of imprinted genes in the placenta. *Placenta* 30: 823–834.
- 542 Capella-Gutiérrez, S., J. M. Silla-Martínez, and T. Gabaldón, 2009 trimAl: a tool for automated  
543 alignment trimming in large-scale phylogenetic analyses. *Bioinformatics* 25: 1972–1973.
- 544 Carter, A. M., and A. Mess, 2007 Evolution of the placenta in eutherian mammals. *Placenta* 28:  
545 259–262.
- 546 Conesa, A., S. Götz, J. M. García-Gómez, J. Terol, M. Talón *et al.*, 2005 Blast2GO: A universal  
547 annotation and visualization tool in functional genomics research. Application note.  
548 *Bioinformatics* 21: 3674–3676.
- 549 van Dongen, S., and C. Abreu-Goodger, 2012 Using MCL to extract clusters from networks.  
550 *Bact. Mol. Networks Methods Protoc.* 281–295.
- 551 Edgar, R. C., 2004 MUSCLE: multiple sequence alignment with high accuracy and high  
552 throughput. *Nucleic Acids Res.* 32: 1792–1797.
- 553 Emera, D., and G. P. Wagner, 2012 Transposable element recruitments in the mammalian  
554 placenta: Impacts and mechanisms. *Brief. Funct. Genomics* 11: 267–276.
- 555 Feschotte, C., 2008 Transposable elements and the evolution of regulatory networks. *Nat. Rev.*  
556 *Genet.* 9: 397–405.
- 557 Gemmell, R. T., 1995 A comparative study of the corpus luteum. *Reprod. Fertil. Dev.* 7: 303–12.
- 558 Grabherr, M. G., B. J. Haas, M. Yassour, J. Z. Levin, D. A. Thompson *et al.*, 2011 Full-length  
559 transcriptome assembly from RNA-Seq data without a reference genome. *Nat. Biotechnol.*  
560 29: 644–652.
- 561 Grove, B. D., and J. P. Wourms, 1991 The follicular placenta of the viviparous fish, *Heterandria*  
562 *formosa*. I. Ultrastructure and development of the embryonic absorptive surface. *J.*  
563 *Morphol.* 209: 265–284.
- 564 Haas, B. J., A. Papanicolaou, M. Yassour, M. Grabherr, D. Philip *et al.*, 2013 De novo transcript  
565 sequence reconstruction from RNA-Seq: reference generation and analysis with Trinity. *Nat.*  
566 *Protoc.* 8: 1–43.
- 567 Hoekstra, H. E., and J. A. Coyne, 2007 The locus of evolution: Evo devo and the genetics of  
568 adaptation. *Evolution (N. Y.)*. 61: 995–1016.
- 569 Jaillon, O., J.-M. Aury, F. Brunet, J.-L. Petit, N. Stange-Thomann *et al.*, 2004 Genome  
570 duplication in the teleost fish *Tetraodon nigroviridis* reveals the early vertebrate proto-  
571 karyotype. *Nature* 431: 946–957.

- 572 John, K., V. Alla, C. Meier, and B. M. Pützer, 2011 GRAMD4 mimics p53 and mediates the  
573 apoptotic function of p73 at mitochondria. *Cell Death Differ.* 18: 874–86.
- 574 Koerner, M. V., F. M. Pauler, R. Huang, and D. P. Barlow, 2009 The function of non-coding  
575 RNAs in genomic imprinting. *Development* 136: 1771–1783.
- 576 Krogh, A., B. Larsson, G. von Heijne, and E. L. Sonnhammer, 2001 Predicting transmembrane  
577 protein topology with a hidden Markov model: application to complete genomes. *J. Mol.*  
578 *Biol.* 305: 567–580.
- 579 Lagesen, K., P. Hallin, E.A. Rødland, H.-H. Stærfeldt, T. Rognes, *et al.*, 2007 RNAmmer:  
580 consistent and rapid annotation of ribosomal RNA genes. *Nucleic Acids Res.* 35: 3100-  
581 3108.
- 582 Langmead, B., and S. L. Salzberg, 2012 Fast gapped-read alignment with Bowtie 2. *Nat.*  
583 *Methods* 9: 357–9.
- 584 Lavielle, C., G. Cornelis, A. Dupressoir, C. Esnault, O. Heidmann *et al.*, 2013 Paleovirology of  
585 “syncytins”, retroviral env genes exapted for a role in placentation. *Philos. Trans. R. Soc. B*  
586 *Biol. Sci.* 368: 20120507–20120507.
- 587 Li, H., and R. Durbin, 2010 Fast and accurate long-read alignment with Burrows-Wheeler  
588 transform. *Bioinformatics* 26: 589–595.
- 589 Lindsay, A. J., 2004 The C2 domains of the class I Rab11 family of interacting proteins target  
590 recycling vesicles to the plasma membrane. *J. Cell Sci.* 117: 4365–4375.
- 591 Liu, B., L. Fang, F. Liu, X. Wang, J. Chen *et al.*, 2015 Identification of Real MicroRNA  
592 Precursors with a Pseudo Structure Status Composition Approach (H. Budak, Ed.). *PLoS*  
593 *One* 10: e0121501.
- 594 Liu, H., J. Yin, M. Xiao, C. Gao, A. S. Mason *et al.*, 2012 Characterization and evolution of 5’  
595 and 3’ untranslated regions in eukaryotes. *Gene* 507: 106–111.
- 596 Love, M. I., W. Huber, and S. Anders, 2014 Moderated estimation of fold change and dispersion  
597 for RNA-seq data with DESeq2. *Genome Biol.* 15: 550.
- 598 Lynch, V. J., R. D. Leclerc, G. May, and G. P. Wagner, 2011 Transposon-mediated rewiring of  
599 gene regulatory networks contributed to the evolution of pregnancy in mammals. *Nat.*  
600 *Genet.* 43: 1154–1159.
- 601 Lynch, V. J., and G. P. Wagner, 2008 Resurrecting the role of transcription factor change in  
602 developmental evolution. *Evolution (N. Y.)*. 62: 2131–2154.
- 603 Maltepe, E., A. I. Bakardjiev, and S. J. Fisher, 2010 The placenta: transcriptional, epigenetic, and  
604 physiological integration during development. *J. Clin. Invest.* 120: 1016–1025.
- 605 Martin, M., 2011 Cutadapt removes adapter sequence from high-throughput sequencing reads.  
606 *EMBnet.journal* 17: 10–12.
- 607 Mei, J., W. Yan, J. Fang, G. Yuan, N. Chen *et al.*, 2014 Identification of a gonad-expression  
608 differential gene insulin-like growth factor-1 receptor (Igf1r) in the swamp eel (*Monopterus*  
609 *albus*). *Fish Physiol. Biochem.* 40: 1181–1190.
- 610 Meredith, R. W., J. E. Janecka, J. Gatesy, O. A. Ryder, C. A. Fisher *et al.*, 2011 Impacts of the  
611 Cretaceous Terrestrial Revolution and KPg extinction on mammal diversification. *Science*  
612 334: 521–524.
- 613 Mi, S., X. Lee, X. Li, G. M. Veldman, H. Finnerty *et al.*, 2000 Syncytin is a captive retroviral  
614 envelope protein involved in human placental morphogenesis. *Nature* 403: 785–789.
- 615 Morgante, M., M. Hanafey, and W. Powell, 2002 Microsatellites are preferentially associated  
616 with nonrepetitive DNA in plant genomes. *Nat. Genet.* 30: 194–200.
- 617 Neilsen, H., 2017 Predicting Secretory Proteins with SignalP., pp. 59-73 in *Methods in*

- 618 *molecular biology* (Clifton, N.J.), United States.
- 619 O'Neill, M. J., B. R. Lawton, M. Mateos, D. M. Carone, G. C. Ferreri *et al.*, 2007 Ancient and  
620 continuing Darwinian selection on insulin-like growth factor II in placental fishes. *Proc.*  
621 *Natl. Acad. Sci.* 104: 12404–12409.
- 622 Ono, R., S. Kobayashi, H. Wagatsuma, K. Aisaka, T. Kohda *et al.*, 2001 A Retrotransposon-  
623 Derived Gene, PEG10, Is a Novel Imprinted Gene Located on Human Chromosome 7q21.  
624 *Genomics* 73: 232–237.
- 625 Panhuis, T. M., G. Broitman-Maduro, J. Uhrig, M. Maduro, and D. N. Reznick, 2011 Analysis of  
626 expressed sequence tags from the placenta of the live-bearing fish *Poeciliopsis*  
627 (*Poeciliidae*). *J. Hered.* esr002.
- 628 Peden, A., E. Schonteich, J. Chun, J. Junutula, R. Scheller *et al.*, 2004 The RCP–Rab11 Complex  
629 Regulates Endocytic Protein Sorting. *Mol. Biol. Cell* 15: 3751–3737.
- 630 Pires, M. N., K. E. McBride, and D. N. Reznick, 2007 Interpopulation variation in life-history  
631 traits of *Poeciliopsis prolifica*: implications for the study of placental evolution. *J. Exp.*  
632 *Zool. A. Ecol. Genet. Physiol.* 307: 113–125.
- 633 Pollux, B. J. A., M. N. Pires, A. I. Banet, and D. N. Reznick, 2009 Evolution of Placentas in the  
634 Fish Family *Poeciliidae*: An Empirical Study of Macroevolution. *Annu. Rev. Ecol. Evol.*  
635 *Syst.* 40: 271–289.
- 636 Ranwez, V., S. Harispe, F. Delsuc, and E. J. P. Douzery, 2011 MACSE: Multiple Alignment of  
637 Coding SEquences accounting for frameshifts and stop codons. *PLoS One* 6: e22594.
- 638 Renfree, M. B., S. Suzuki, and T. Kaneko-Ishino, 2013 The origin and evolution of genomic  
639 imprinting and viviparity in mammals. *Phil. Trans. R. Soc. B* 368: 20120151.
- 640 Reznick, D., 1981 “Grandfather Effects”: The Genetics of Interpopulation Differences in  
641 Offspring Size in the Mosquito Fish. *Evolution* (N. Y). 35: 941–953.
- 642 Reznick, D. N., M. Mateos, and M. S. Springer, 2002 Independent origins and rapid evolution of  
643 the placenta in the fish genus *Poeciliopsis*. *Science* (80-. ). 298: 1018–1020.
- 644 Roberts, A., and L. Pachter, 2013 Streaming fragment assignment for real-time analysis of  
645 sequencing experiments. *Nat. Methods* 10: 71–73.
- 646 Schartl, M., R. B. Walter, Y. Shen, T. Garcia, J. Catchen *et al.*, 2013 The genome of the  
647 platyfish, *Xiphophorus maculatus*, provides insights into evolutionary adaptation and  
648 several complex traits. *Nat. Genet.* 45: 567–572.
- 649 Schlueter, P. J., G. Peng, M. Westerfield, and C. Duan, 2007 Insulin-like growth factor signaling  
650 regulates zebrafish embryonic growth and development by promoting cell survival and cell  
651 cycle progression. *Cell Death Differ.* 14: 1095–1105.
- 652 Steinke, D., W. Salzburger, I. Braasch, and A. Meyer, 2006 Many genes in fish have species-  
653 specific asymmetric rates of molecular evolution. *BMC Genomics* 7: 20.
- 654 Stern, D. L., and V. Orgogozo, 2008 The loci of evolution: how predictable is genetic evolution?  
655 *Evolution* (N. Y). 62: 2155–2177.
- 656 Theocharidis, A., S. van Dongen, A. J. Enright, and T. C. Freeman, 2009 Network visualization  
657 and analysis of gene expression data using BioLayout Express(3D). *Nat. Protoc.* 4: 1535–  
658 1550.
- 659 Turner, C. L., 1940 Pseudoamnion, pseudochorion, and follicular pseudoplacenta in poeciliid  
660 fishes. *J. Morphol.* 67: 59–89.
- 661 Ulitsky, I., A. Shkumatava, C. H. Jan, H. Sive, and D. P. Bartel, 2011 Conserved function of  
662 lincRNAs in vertebrate embryonic development despite rapid sequence evolution. *Cell* 147:  
663 1537–1550.

- 664 Wallace, D. M. E., A. J. Lindsay, A. G. Hendrick, and M. W. McCaffrey, 2002 Rab11-FIP4  
665 interacts with Rab11 in a GTP-dependent manner and its overexpression condenses the  
666 Rab11 positive compartment in HeLa cells. *Biochem. Biophys. Res. Commun.* 299: 770–  
667 779.
- 668 Watanabe, H., K. Nonoguchi, T. Sakurai, T. Masuda, K. Itoh *et al.*, 2005 A novel protein Depp,  
669 which is induced by progesterone in human endometrial stromal cells activates Elk-1  
670 transcription factor. *Mol. Hum. Reprod.* 11: 471–476.
- 671 Wren, J. D., E. Forgacs, J. W. Fondon, A. Pertsemlidis, S. Y. Cheng *et al.*, 2000 Repeat  
672 Polymorphisms within Gene Regions: Phenotypic and Evolutionary Implications. *Am. J.*  
673 *Hum. Genet.* 67: 345–356.
- 674 Yang, Z., 2007 PAML 4: Phylogenetic analysis by maximum likelihood. *Mol. Biol. Evol.* 24:  
675 1586–1591.
- 676 Zeh, J. A., and D. W. Zeh, 2008 Viviparity-driven Conflict. *Ann. N. Y. Acad. Sci.* 1133: 126–  
677 148.
- 678
- 679
- 680

681

682 **Figure Legends:**

683 **Figure 1.** Distributions of various transcriptome annotations for *Poeciliopsis prolifica* reference  
684 transcriptome predicted transcripts (blue) and alternatively-spliced variant groups, representing  
685 “genes” (red). 140,709 transcripts (29.4% of total) exhibited identifiable homology (e-value < 1  
686 x 10<sup>-5</sup>) with protein reference sequences in the NCBI *nr* database and another 29,199 (6.1%)  
687 transcripts showed similarity (e-value < 1 x 10<sup>-5</sup>) with nucleotide reference sequence in the NCBI  
688 *nt* database. 16,277 (11.6%) and 6,772 (4.8%) transcripts are associated with transmembrane  
689 (TMHMM) and signaling (SignalP) proteins. 8,181 showed greater than 70% coverage of known  
690 UniProtKB/Swiss-Prot orthologs; 3,785 transcripts were identified as containing the complete  
691 ORFs of conserved orthologs in UniProtKB/Swiss-Prot database (Table S2).

692 **Figure 2.** Level 2 gene ontology term distributions for reference transcriptome of *Poeciliopsis*  
693 *proliflica*.

694 **Figure 3.** Three-dimensional gene atlas derived from gene expression data for maternal  
695 placental/ovarian complex (MPC), late-stage embryonic, brain, and liver tissue. Proximity in  
696 space indicates similarity in gene expression profile across tissues. Clusters were defined using  
697 MCL clustering algorithm on highly expressed genes (>50 FPKM in at least on tissue type) from  
698 Roche 454 RNA-seq. Clusters 1-4 are mostly, though not exclusively, made up of transcripts that  
699 are tissue-specifically expressed, while clusters 5-9 consist of transcripts that are highly  
700 expressed across multiple tissues. Each of these clusters (1-9), had 2,940, 1,734, 1,638, 373, 65,  
701 30, 28, 25, and 5 members, respectively.

702 **Figure 4.** Venn diagrams showing patterns of shared and unshared proteins and sites within  
703 protein under positive selection among the three foreground taxon groupings tested with PAML.

704 **Figure 5.** Distribution of GO Terms that were differentially represented in genes identified to be  
705 under positive selection in the matrotrophic/placental(PL) *Poeciliopsis prolifica* and  
706 lecithotrophic(LC) *Xiphophorus maculatus*. GO terms include categories from all three main  
707 ontologies (Biological Processes; Molecular Functions; Cellular Components).



708 **Figure 6.** Diagrams of *insulin growth factor-1 receptor-A (IGF1RA)* from *Xiphophorus*  
709 *maculatus*, and *RAB11 family-interacting protein 1-like and 4-like (RAB11FIP1 and*  
710 *RAB11FIP4*, respectively) from *Poeciliopsis prolifica* showing known protein domains, indel  
711 regions among species (identified using regions of multiple sequence alignment), and sites  
712 identified as being under positive selection from PAML analysis in live-bearing poeciliids, the  
713 lecithotrophic *Xiphophorus maculatus*, or the matrotrophic *Poeciliopsis prolifica*.

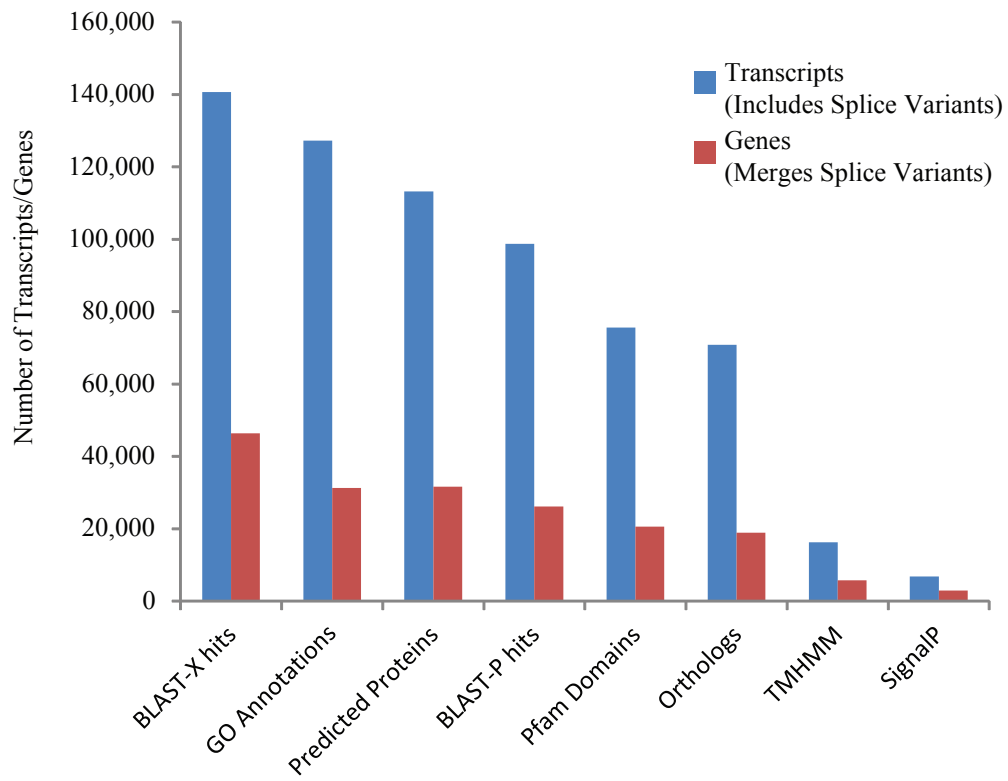

Figure 1.

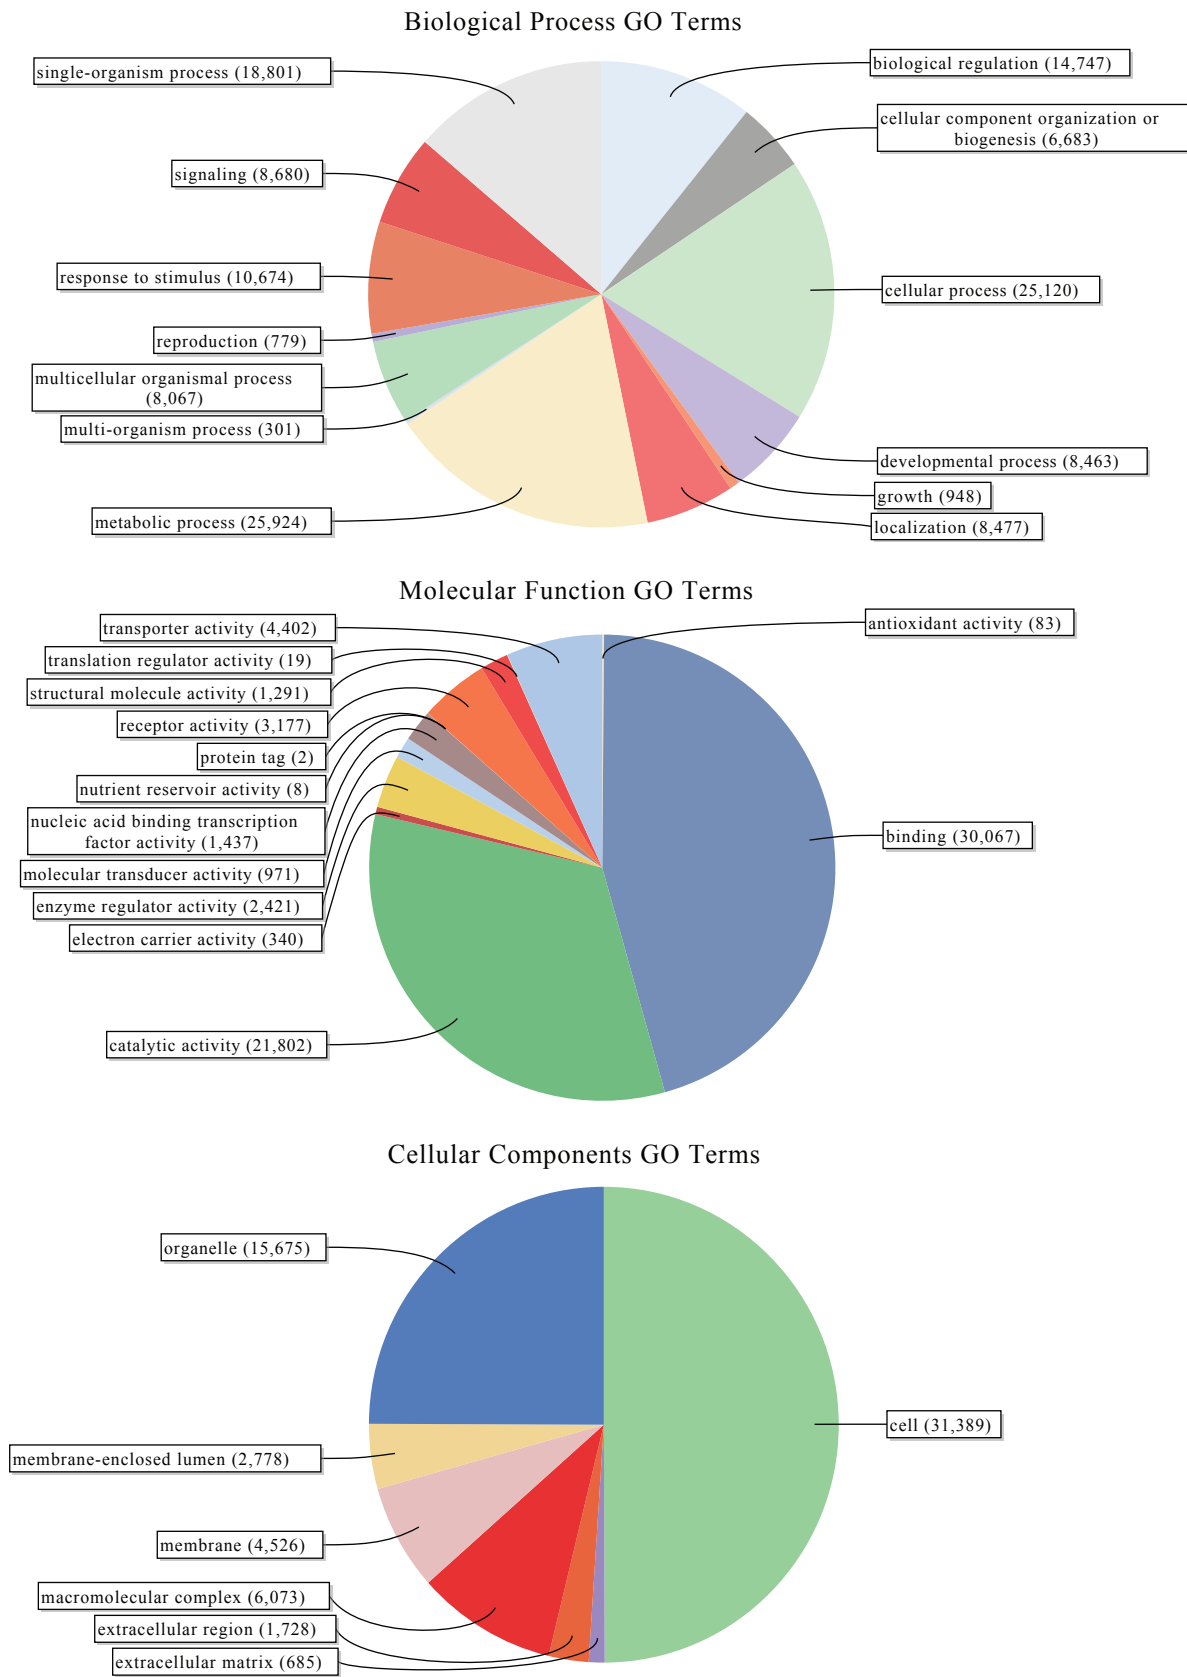

Figure 2.

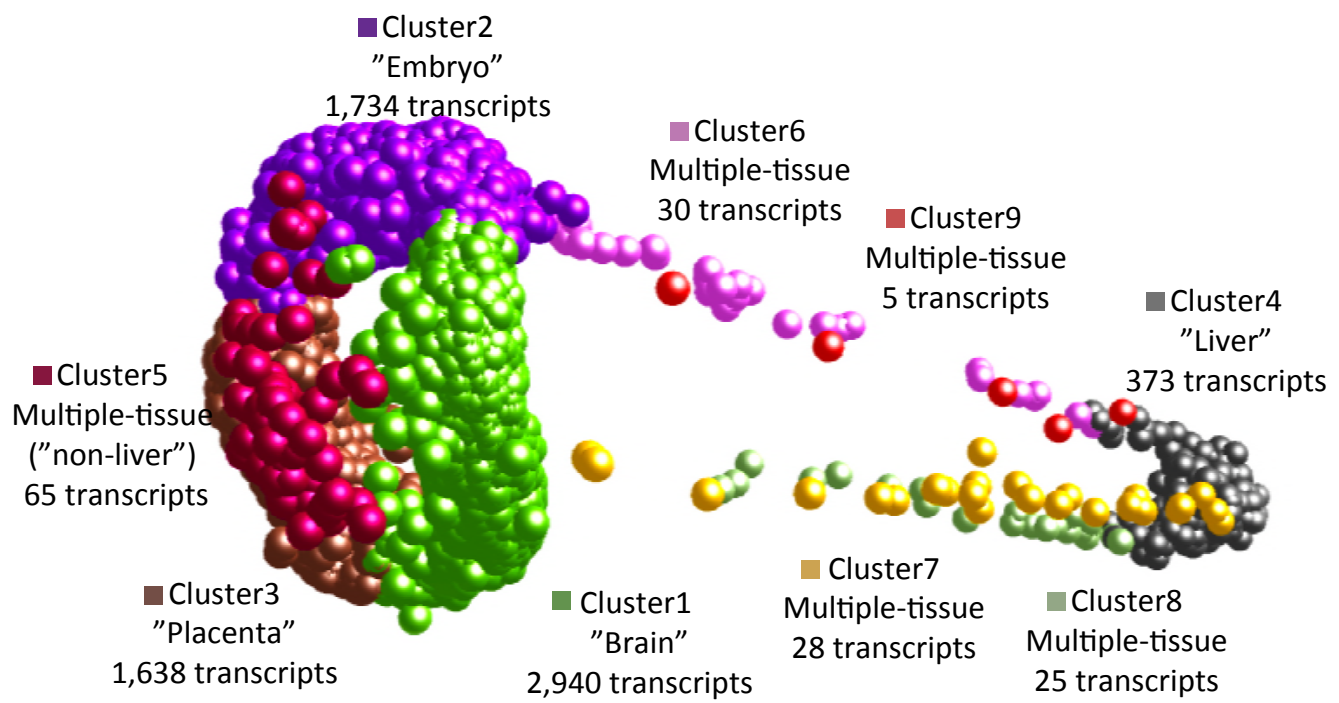

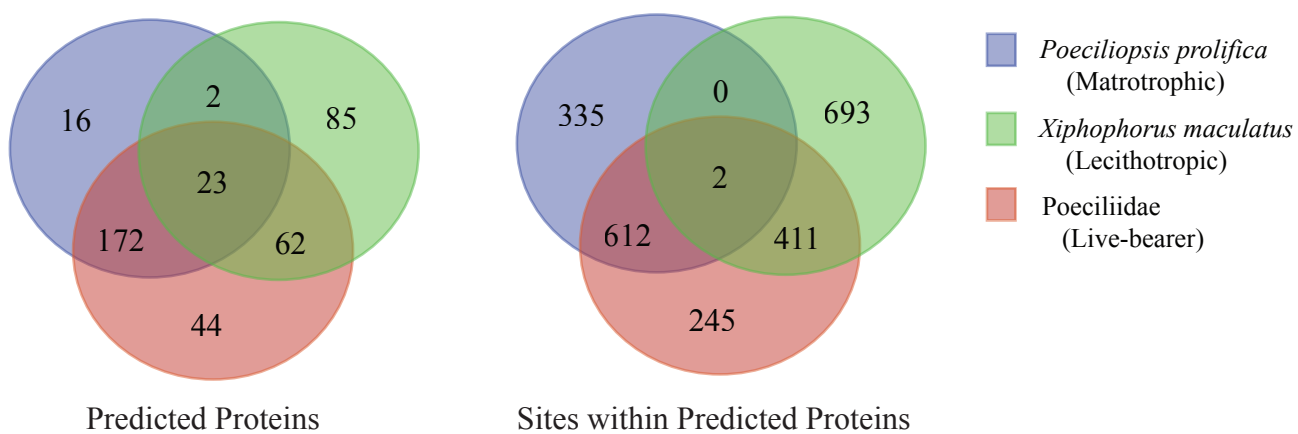

Figure 4.

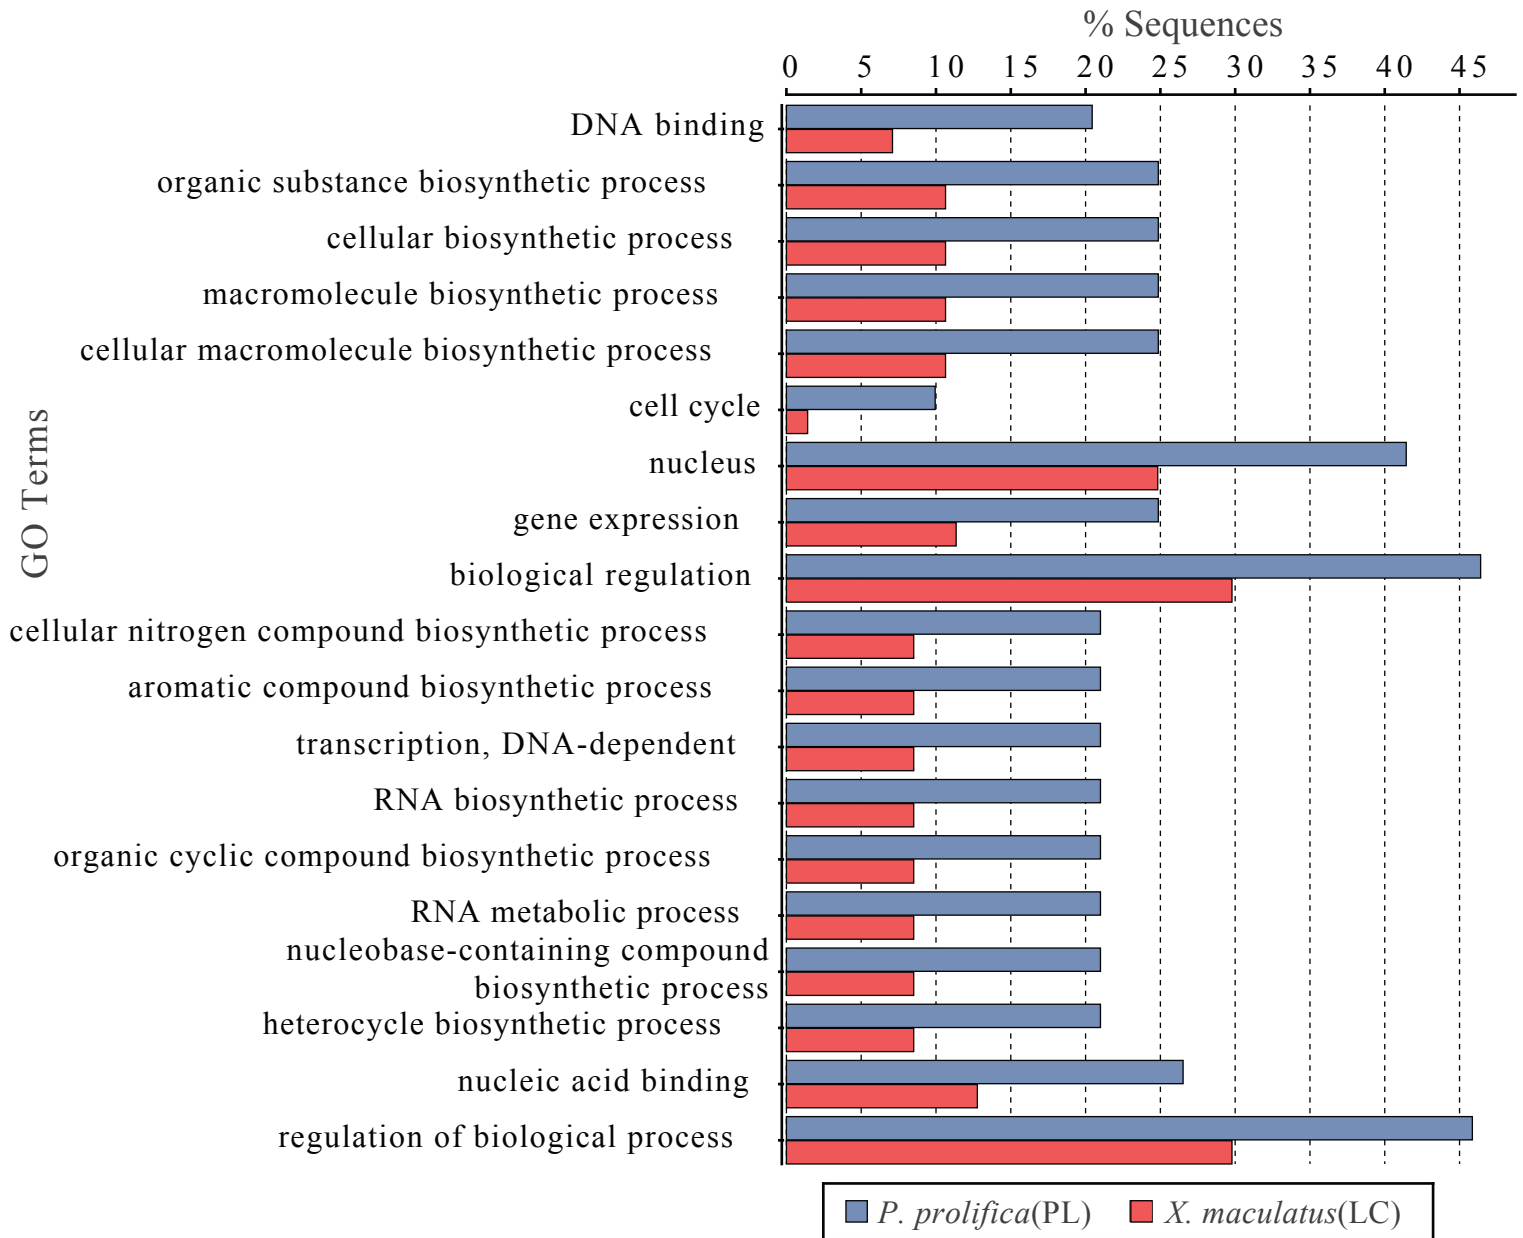

Figure 5.

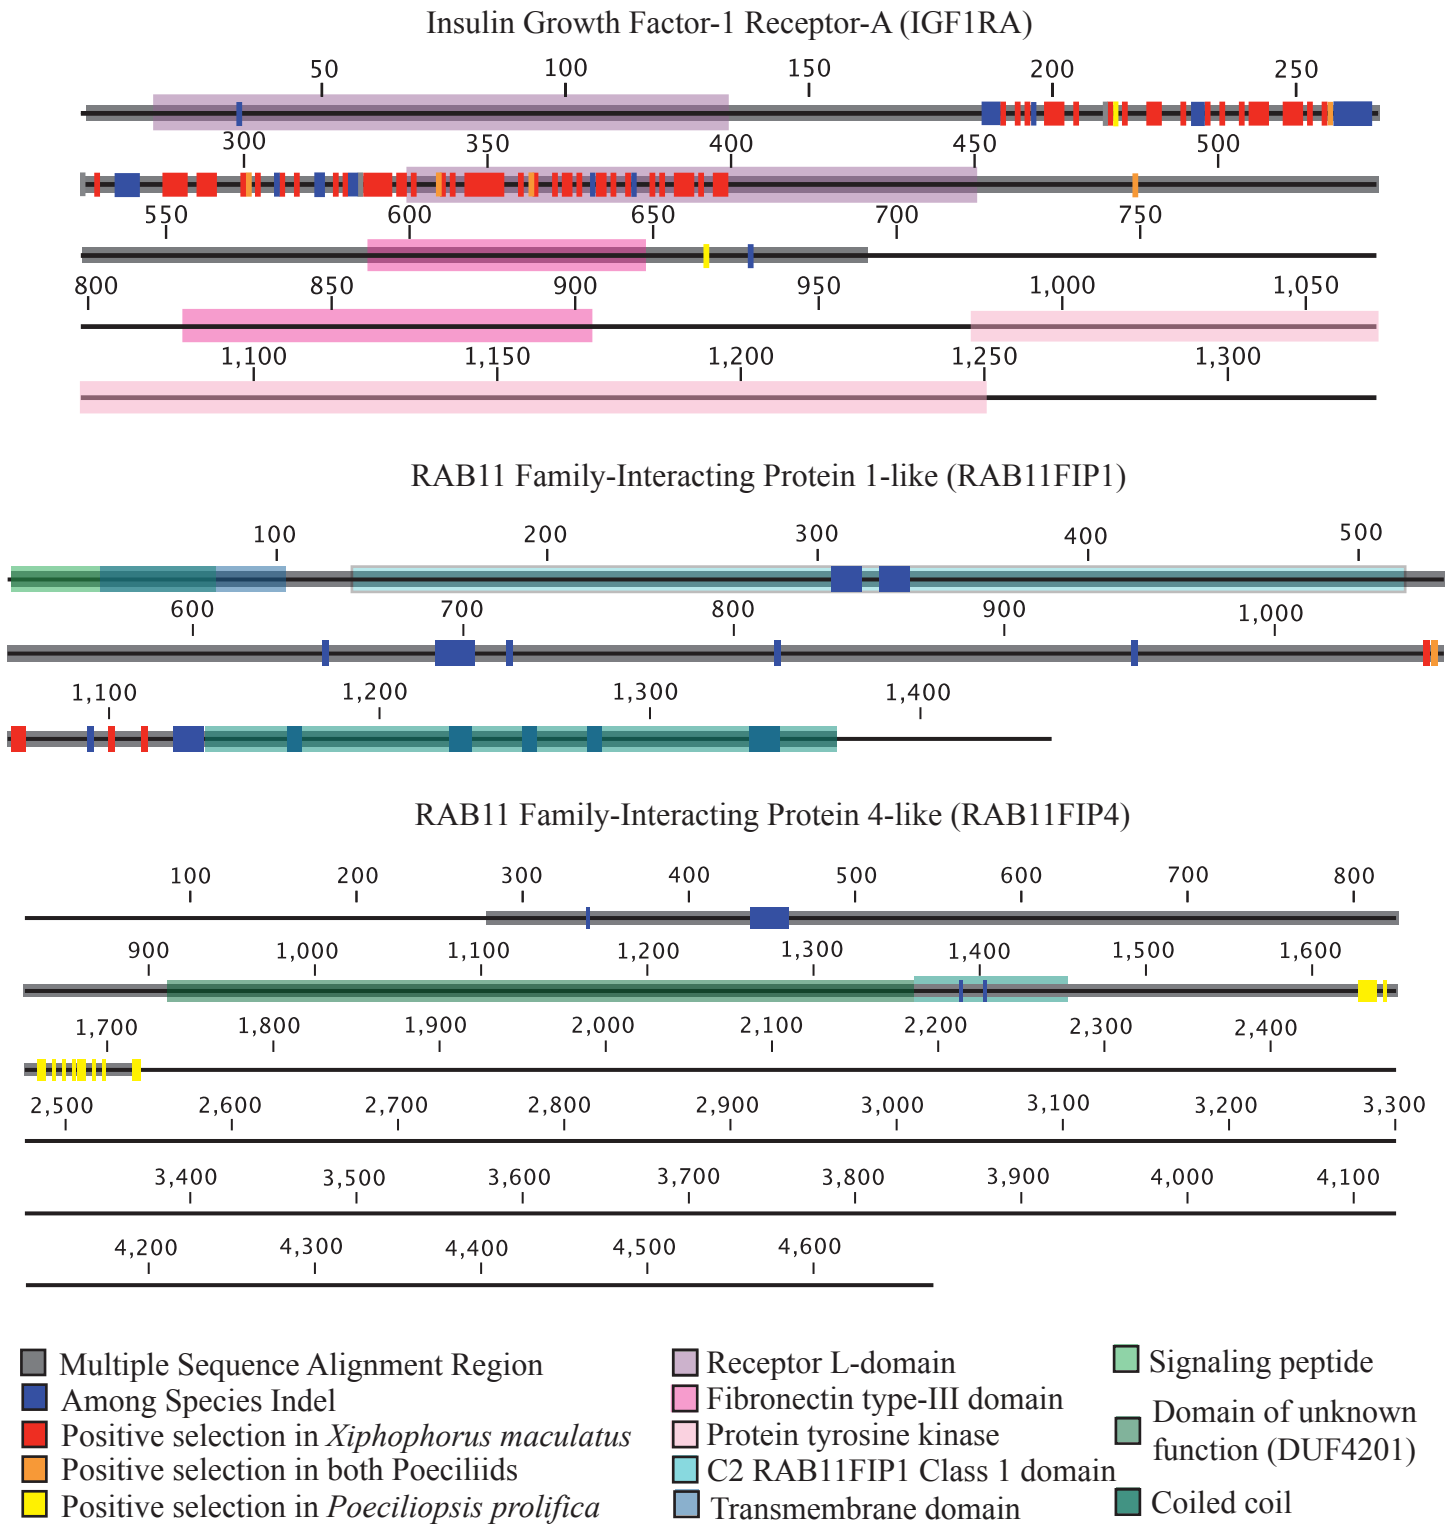

Figure 6.

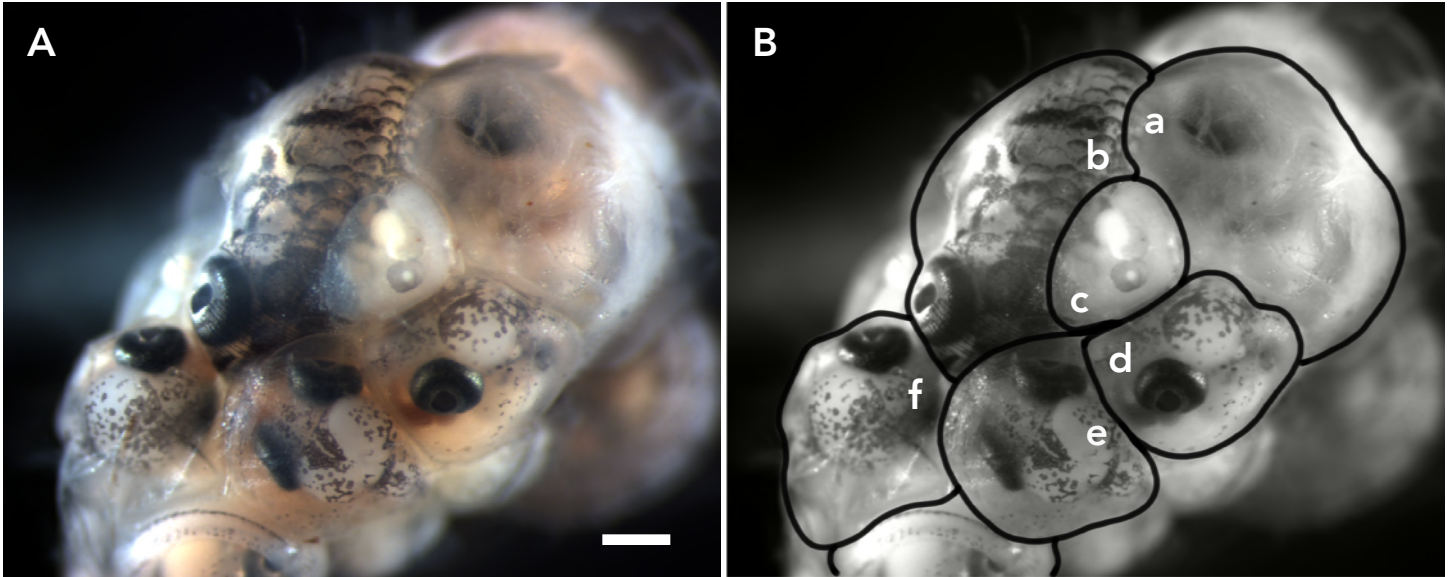

Figure S1. **A and B.** Intact ovary removed from gravid female. Scale bar = 0.5mm. **B.** Outlines of the different embryos within the ovary shown in **A.** **a.** maternal/placental ovarian tissue complex (MPC) with late stage embryo removed, **b.** Very Late-eyed stage embryo (i.e. nearly full term, Stage 6), **c.** Early-eyed stage embryo (Stage 3), **d.-f.** Late-eyed stage embryo (Stage 5).



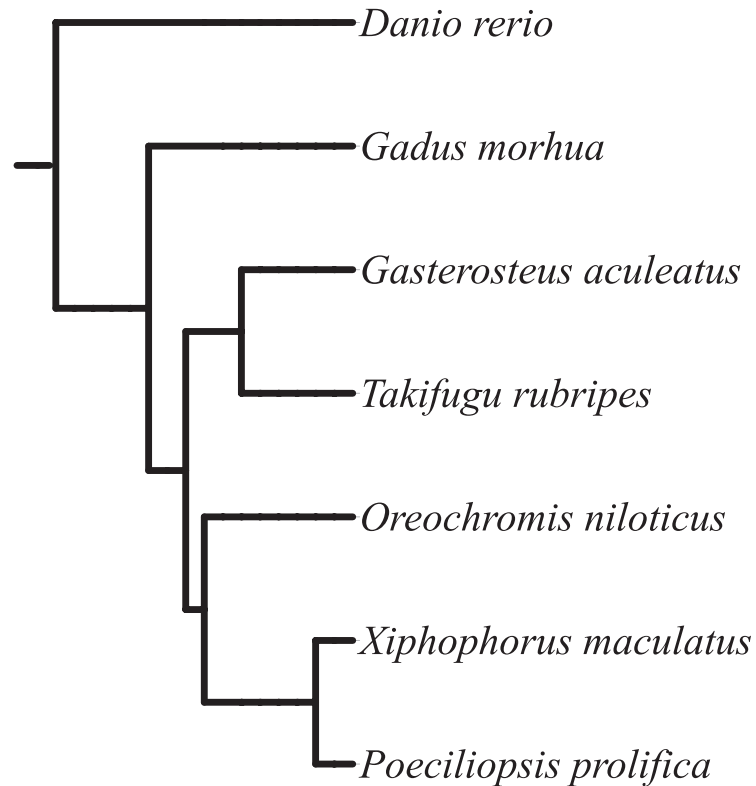

Figure S2. Species tree used in PAML. Tested foregrounds of live-bearing Poeciliids generally, lecithotrophic live-bearers, and matrotrophic live-bearers using the clade of Poeciliids, the *Xiphophorus maculatus* lineage, and the *Poeciliopsis prolifica* lineage, respectively for each case.

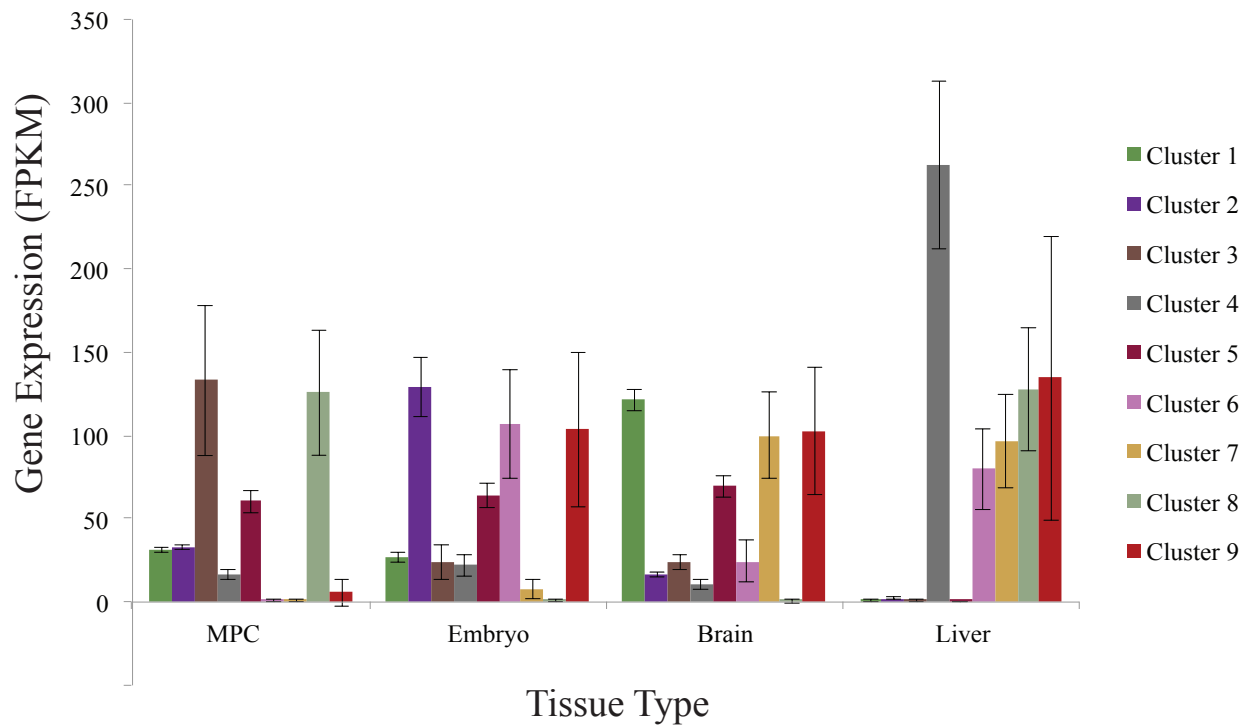

Figure S3. Average expression in fragments per kilobase per million base pairs (FPKM) in each tissue grouped by cluster genes indicating which clusters are associated with which tissues. Standard error bars shown. MPC indicates maternal placental/ovarian complex tissue sample.

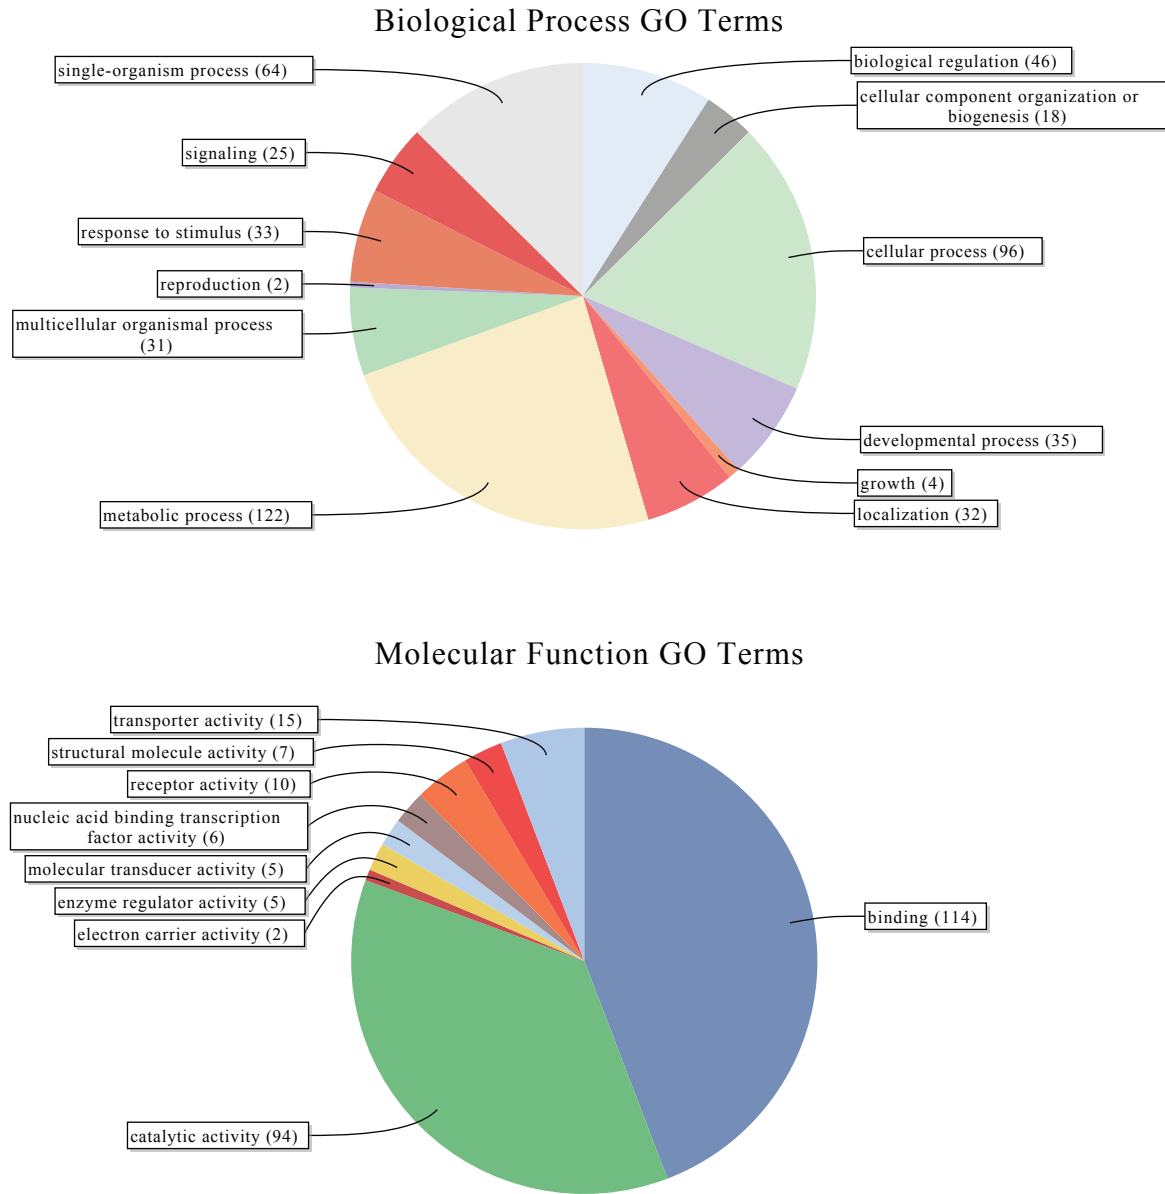

Figure S4. Level 2 Biological Process and Molecular Function Gene Ontology terms associated with gene identified as having sites under positive selection in poeciliids.

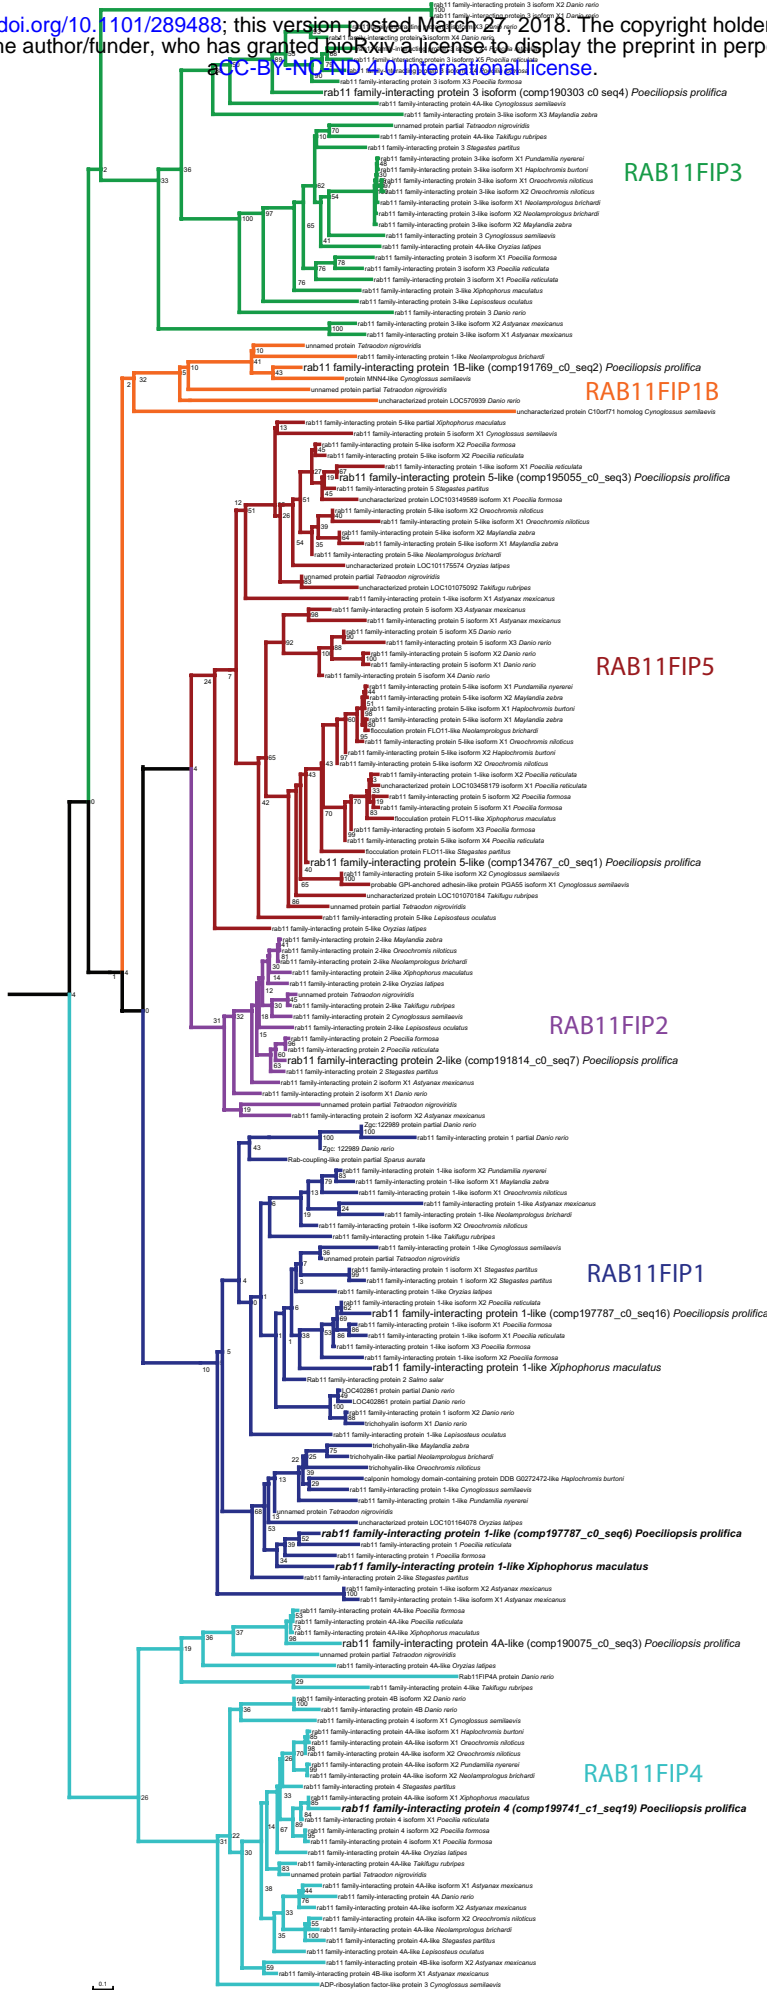

Figure S5. Phylogenetic distance-based gene-family tree for *RAB11* family-interacting proteins (RAB11FIPs) in fishes. Each color represents different gene family member protein group. RAB11FIPs found in *Poeciliopsis prolifica* are enlarged fonts. Proteins with sites found to be under positive selection in PAML analysis is bold italics; specifically, RAB11FIP1 in *P. prolifica* and *X. maculatus* and RAB11FIP4 in *P. prolifica* only.
